# Supplementary material
Source: MDPI journal article supplement (https://www.mdpi.com/1999-4907/13/2/354)
Supplement: s1 [file s1 › forests-1584406-supplementary.pdf]

### **Supplementary Figure legends**

Figure S1. GO annotation of DEGs in the grafted willows of 9901/YJ comparing with YJ/YJ

Figure S2. The mobile genes (in gray) involved in plant hormone signal transduction pathway

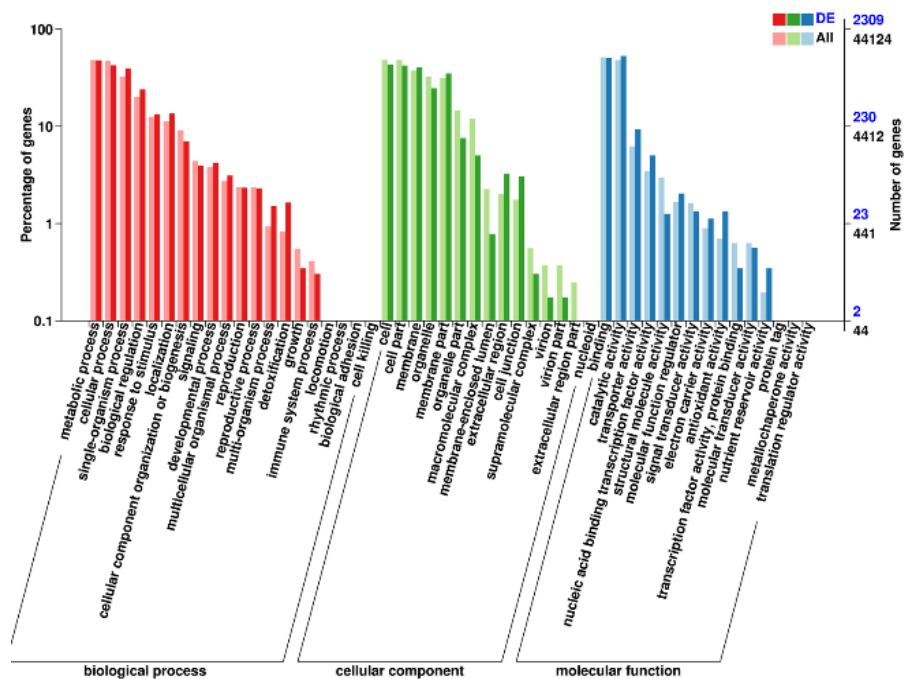

Figure S1. GO annotation of DEGs in the grafted willows of 9901/YJ comparing with YJ/YJ

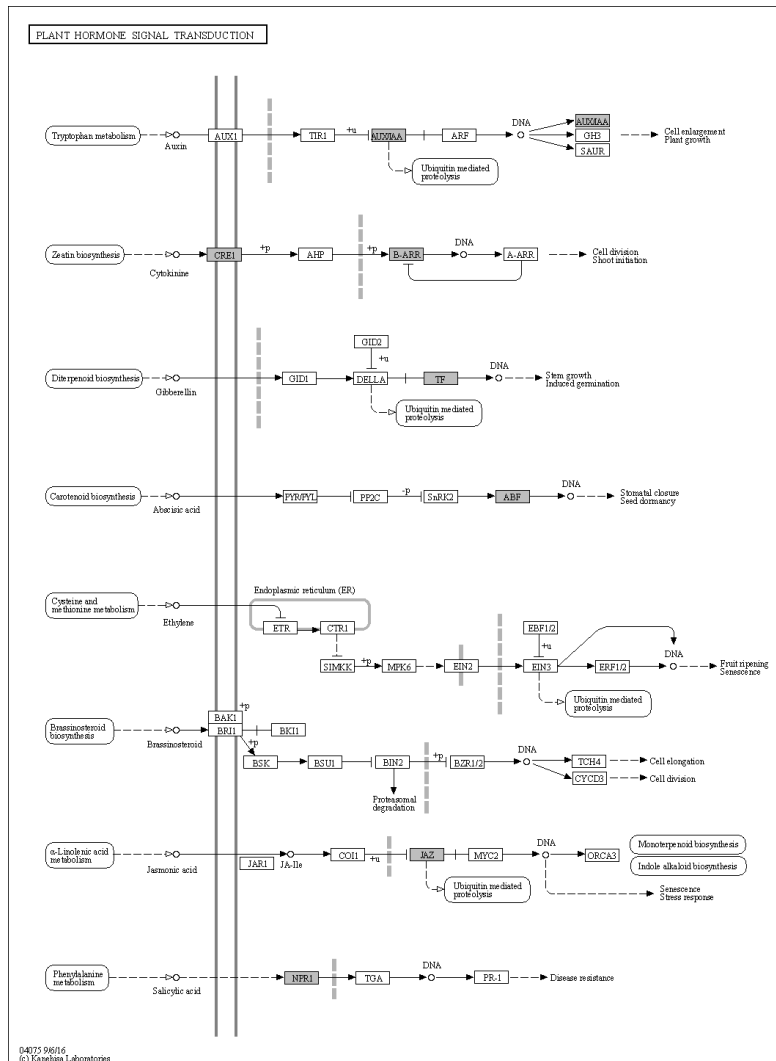

Figure S2. The mobile genes (in gray) involved in plant hormone signal transduction pathway
